# Supplementary material for: Alteration of Growth Performance, Antioxidant Capacity, Tissue Fatty Acid Profiles, and Lipid Metabolism of Mud Crab (Scylla paramamosain) Juvenile in Response to Different Dietary Arachidonic Acid Levels
Source: Aquac Nutr. 2022 Nov 23;2022:6038613. doi: 10.1155/2022/6038613 (PMC10281821; doi:10.1155/2022/6038613)
Supplement: Supplementary Materials — Supplementary file for this manuscript: real-time quantitative PCR primers for lipid-metabolism genes of mud crab are attached. [file 6038613.f1.docx]

**Alteration of** **growth performance,** **antioxidant capacity, tissue fatty acid profiles and lipid metabolism of mud crab (*Scylla paramamosain*)** **juvenile in response to different dietary arachidonic acid levels**

Fang Fang 1,2,a, Ye Yuan 3,a, Min Jin 1,2, Yingying Zhang 1,2, Tingting Zhu 1,2, Jiaxiang Luo 1,2, Zheng Yang 1,2, Chen Guo 1,2, Lefei Jiao 1,2, Xiaojun Yan1,2, Qicun Zhou 1,2*

*1 Laboratory of Fish and Shellfish Nutrition, School of Marine Sciences, Ningbo University, Ningbo 315211, China*

*2 Key Laboratory of Aquaculture Biotechnology Ministry of Education, Ningbo University, Ningbo 315211, China*

*3 Guangdong Provincial Key Laboratory of Marine Biotechnology, Institute of Marine Sciences, Shantou University, Shantou 515063, China*

***Corresponding author:**

*E-mail address*: zhouqicun@nbu.edu.cn (Qicun Zhou)

a These authors contributed equally to this work as first author.

SUPPLEMENTARY TABLE 1: Real-time quantitative PCR primers for lipid-metabolism genes of mud crab

| Gene | Nucleotide sequence (from 5′ to 3′) | Size (bp) | GenBank no. |
| --- | --- | --- | --- |
| *fas* | F: CATTCTGGGCATCAAGGA | 263 | HM217807.1 |
| R: TGTTGGAGTCAGGGAGCA |
| *acc* | F: AACTGTACGGTGGAGTGTGT | 238 | PRJNA634782 |
| R: TCCTGTCCATCTGCAACCTT |
| *6gpd* | F: TCAATCGCACCACGGAGA | 124 | PRJNA634782 |
| R: AGCATAACACGCCTCGGT |
| *g6pd* | F: AATGAGAGGAAGGCTGAGGT | 194 | PRJNA634782 |
| R: CGGTCGCCATAAGTCAAGTC |
| *fabp1* | F: CACGCCATCCAACTCAAC | 109 | JQ824129.1 |
| R: CATCACCATTCCCACACC |
| *fabp4* | F: ATTGGTGAGATTTGCCGCTA | 218 | PRJNA634782 |
| R: ACAAAGCCGACTGCTCCTAC |
| *srb2* | F: CTGCTCGCTTTATCACACCC | 153 | LT797149.2 |
| R: GAACCACCATTCCGCTTGTT |
| *hsl* | F: TTTGTCAGTGGCAGTGTTGG | 151 | PRJNA634782 |
| R: CCTCAGTCTGTCCATGGTGT |
| *aco1* | F: TGAGGACAGATACGCTAACG | 156 | PRJNA634782 |
| R: TCTGTGCCAGTGGGTGAGGT |
| *aco3* | F: TTGATGATGTGGGCTGCTTT | 132 | PRJNA634782 |
| R: TCTGTGCCAGTGGGTGAGGT |
| *cpt1* | F: CTTGTCCGTCGCCTTGTAGA | 222 | PRJNA634782 |
| R: ATTGAGCAGCCGACCCTTAT |
| *cpt2* | F: GCACAACTCCCAAGTCATTC | 164 | PRJNA634782 |
| R: AAAATGTCTGGCATAGGGGA |
| *srebp1* | F: AGTGACACGGCAACTCCTG | 113 | MH910503.1 |
| R: ACAAACATTCCCTCGTACATC |
| *hnf4α* | F: GCACCTCTCCAGACAGTTCT | 250 | PRJNA634782 |
| R: CAGAATCATGTCCTGCAGCC |
| *β-actin* | F: GCGGCAGTGGTCATCTCCT | 168 | KC795683.1 |
| R: GCCCTTCCTCACGCTATCCT |

*fas*, fatty acid synthase; *acc*, acetyl-CoA carboxylase; *6pgd*, 6-phosphogluconate dehydrogenase; *g6pd*, glucose-6-phosphate dehydrogenase; *fabp*, fatty acid binding protein; *srb2*, scavenger receptor class 2; *hsl*, hormone-sensitive lipase; *aco*, 1-aminocyclop ropane-1-carboxylic acid oxidase; *cpt*, carnitine palmitoyltransferase; *srebp1*, sterol regulatory element-binding protein 1; *hnf4α*, hepatocyte nuclear factor 4α.
